# Supplementary material for: A spike virosome vaccine induces pan-sarbecovirus antibody responses in mice
Source: PubMed Central journal article supplement (PMC11068555; doi:10.1016/j.isci.2024.109719), 2024-04-10
Supplement: mmc1.pdf [file mmc1.pdf]

## **Supplemental information**

### **A spike virosome vaccine induces pan-sarbecovirus antibody responses in mice**

**Mitch Brinkkemper, Meliawati Poniman, Esther Siteur-van Rijnstra, Widad Ait Iddouch, Tom P.L. Bijl, Denise Guerra, Khadija Tejjani, Marloes Grobber, Farien Bhoelan, Denzel Bemelman, Ronald Kempers, Marit J. van Gils, Kwinten Sliepen, Toon Stegmann, Yme U. van der Velden, and Rogier W. Sanders**

**A**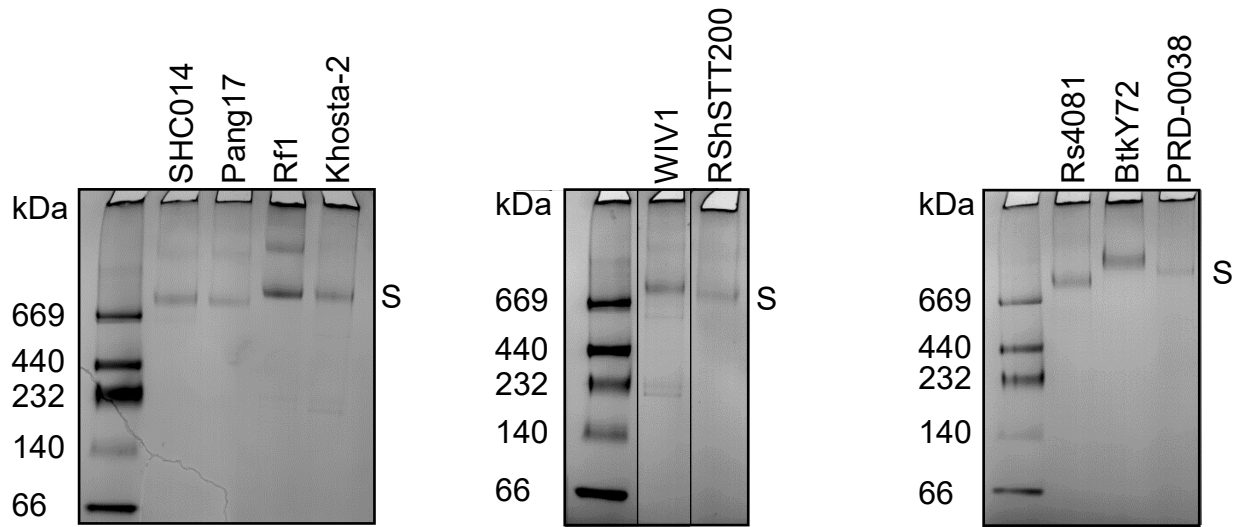**B**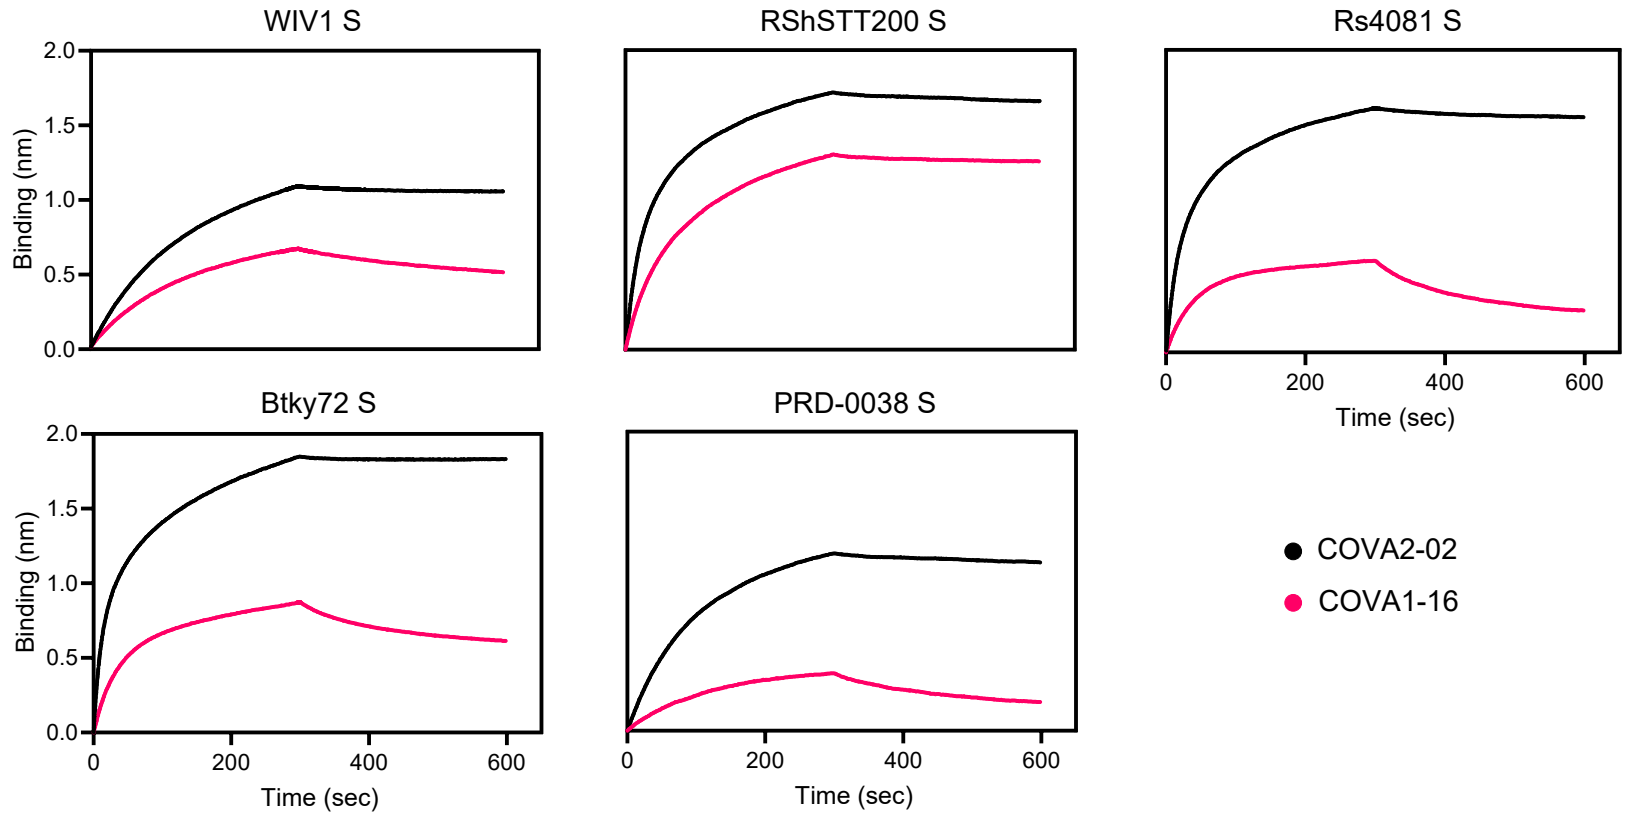

**Figure S1. Sarbecovirus S characterization, related to figure 1** (A) Blue-Native PAGE gels of purified S proteins. (B) BLI sensorgrams of binding reactions of monoclonal Abs isolated from SARS-CoV-2 survivors to sarbecovirus S

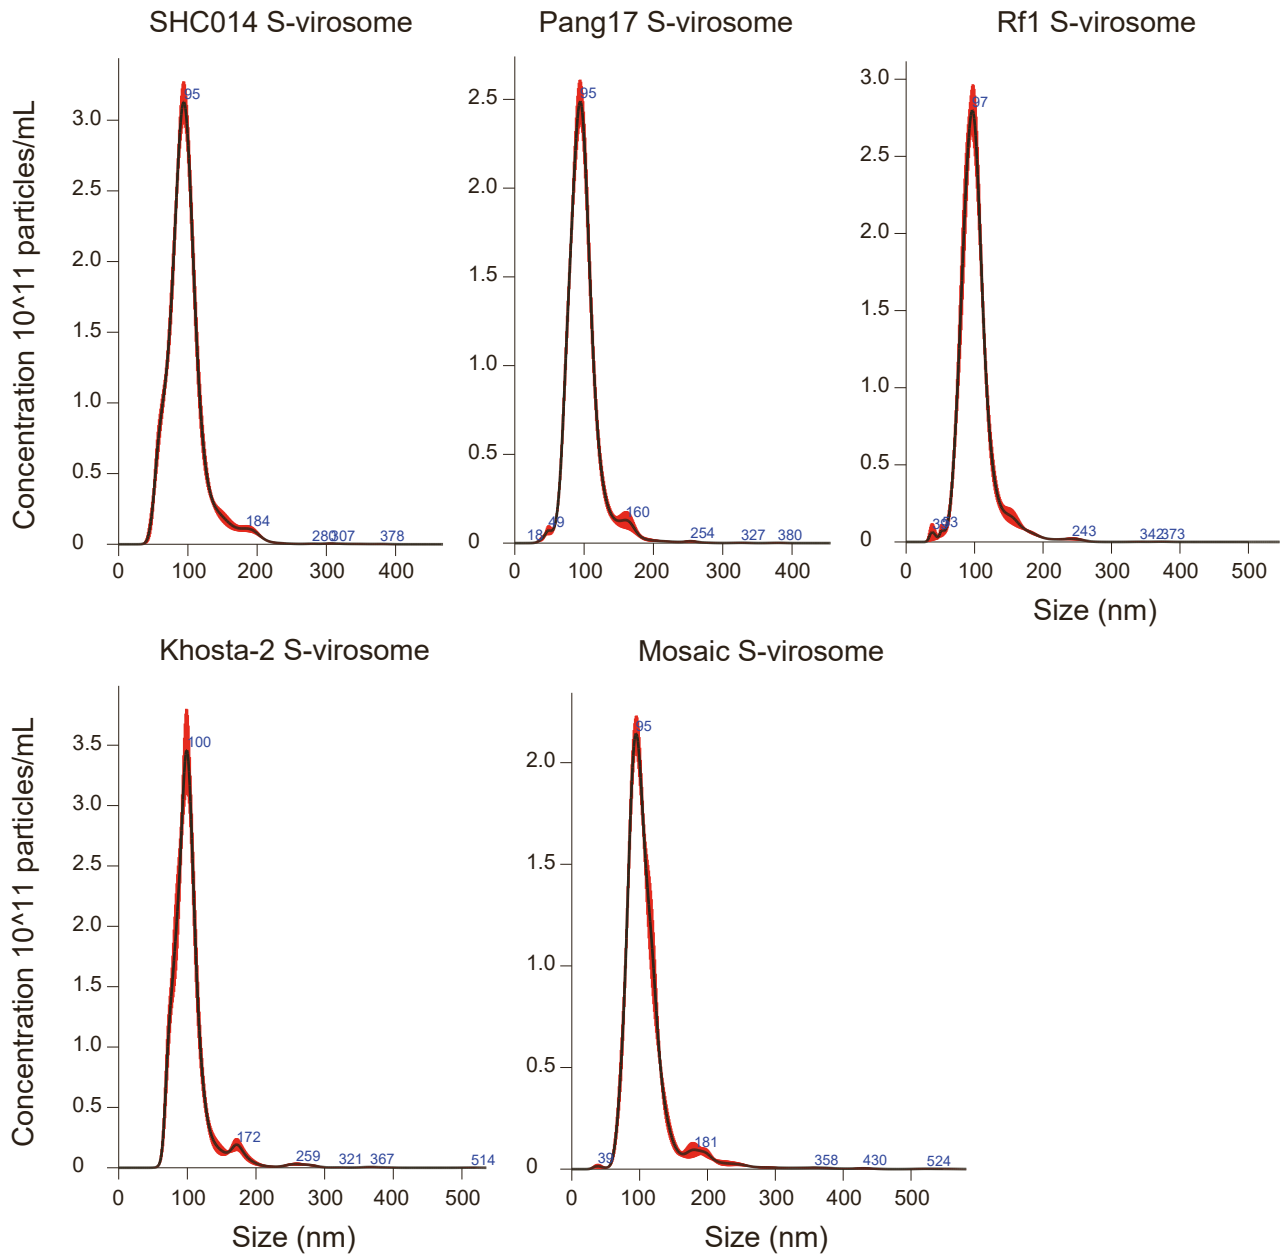

**Figure S2. S-virosome size distribution, related to figure 1 Virosome size distribution as measured by nanosight.**

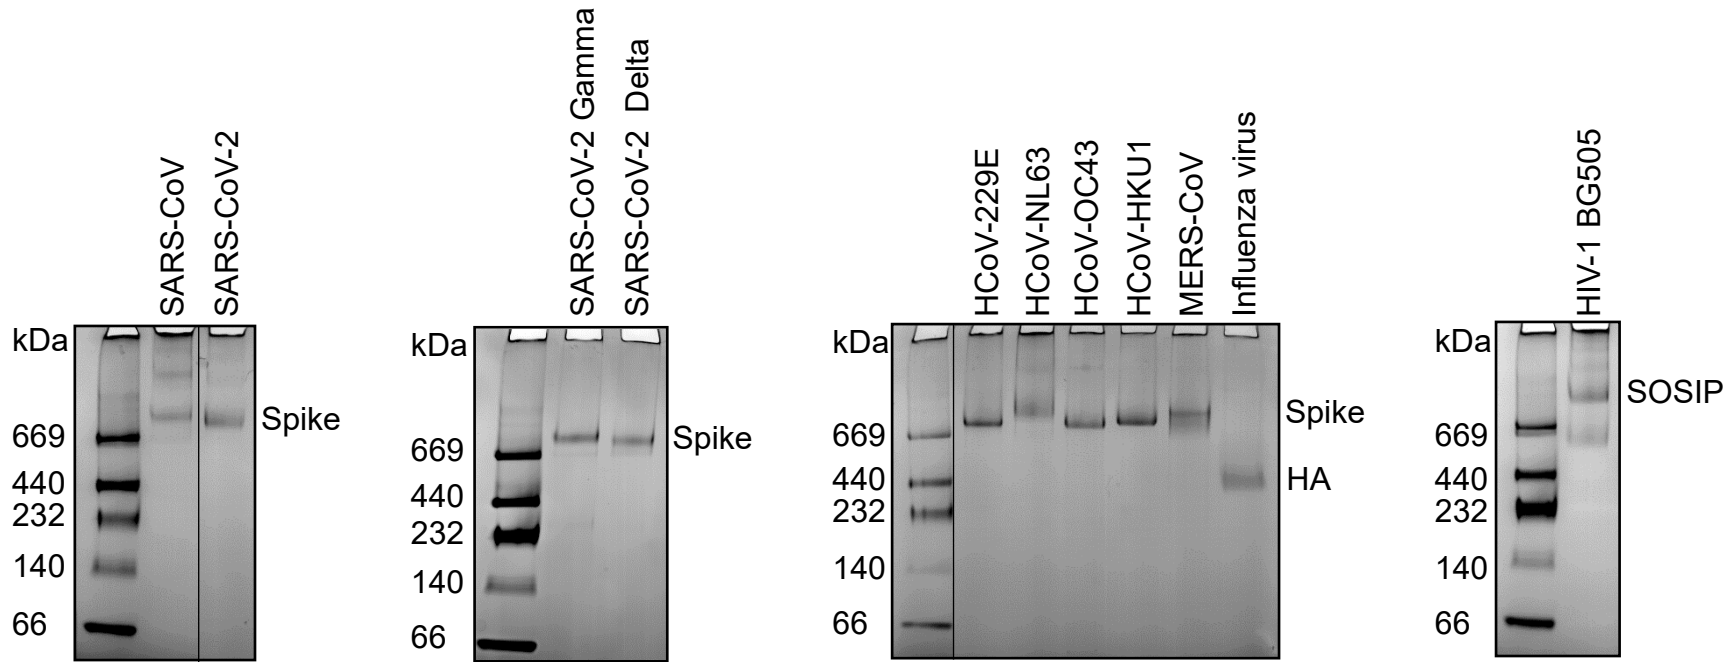

**Figure S3. Luminex assay protein panel characterization, related to figure 2 Blue-Native PAGE gels of purified glycoproteins used in the custom Luminex assay.**

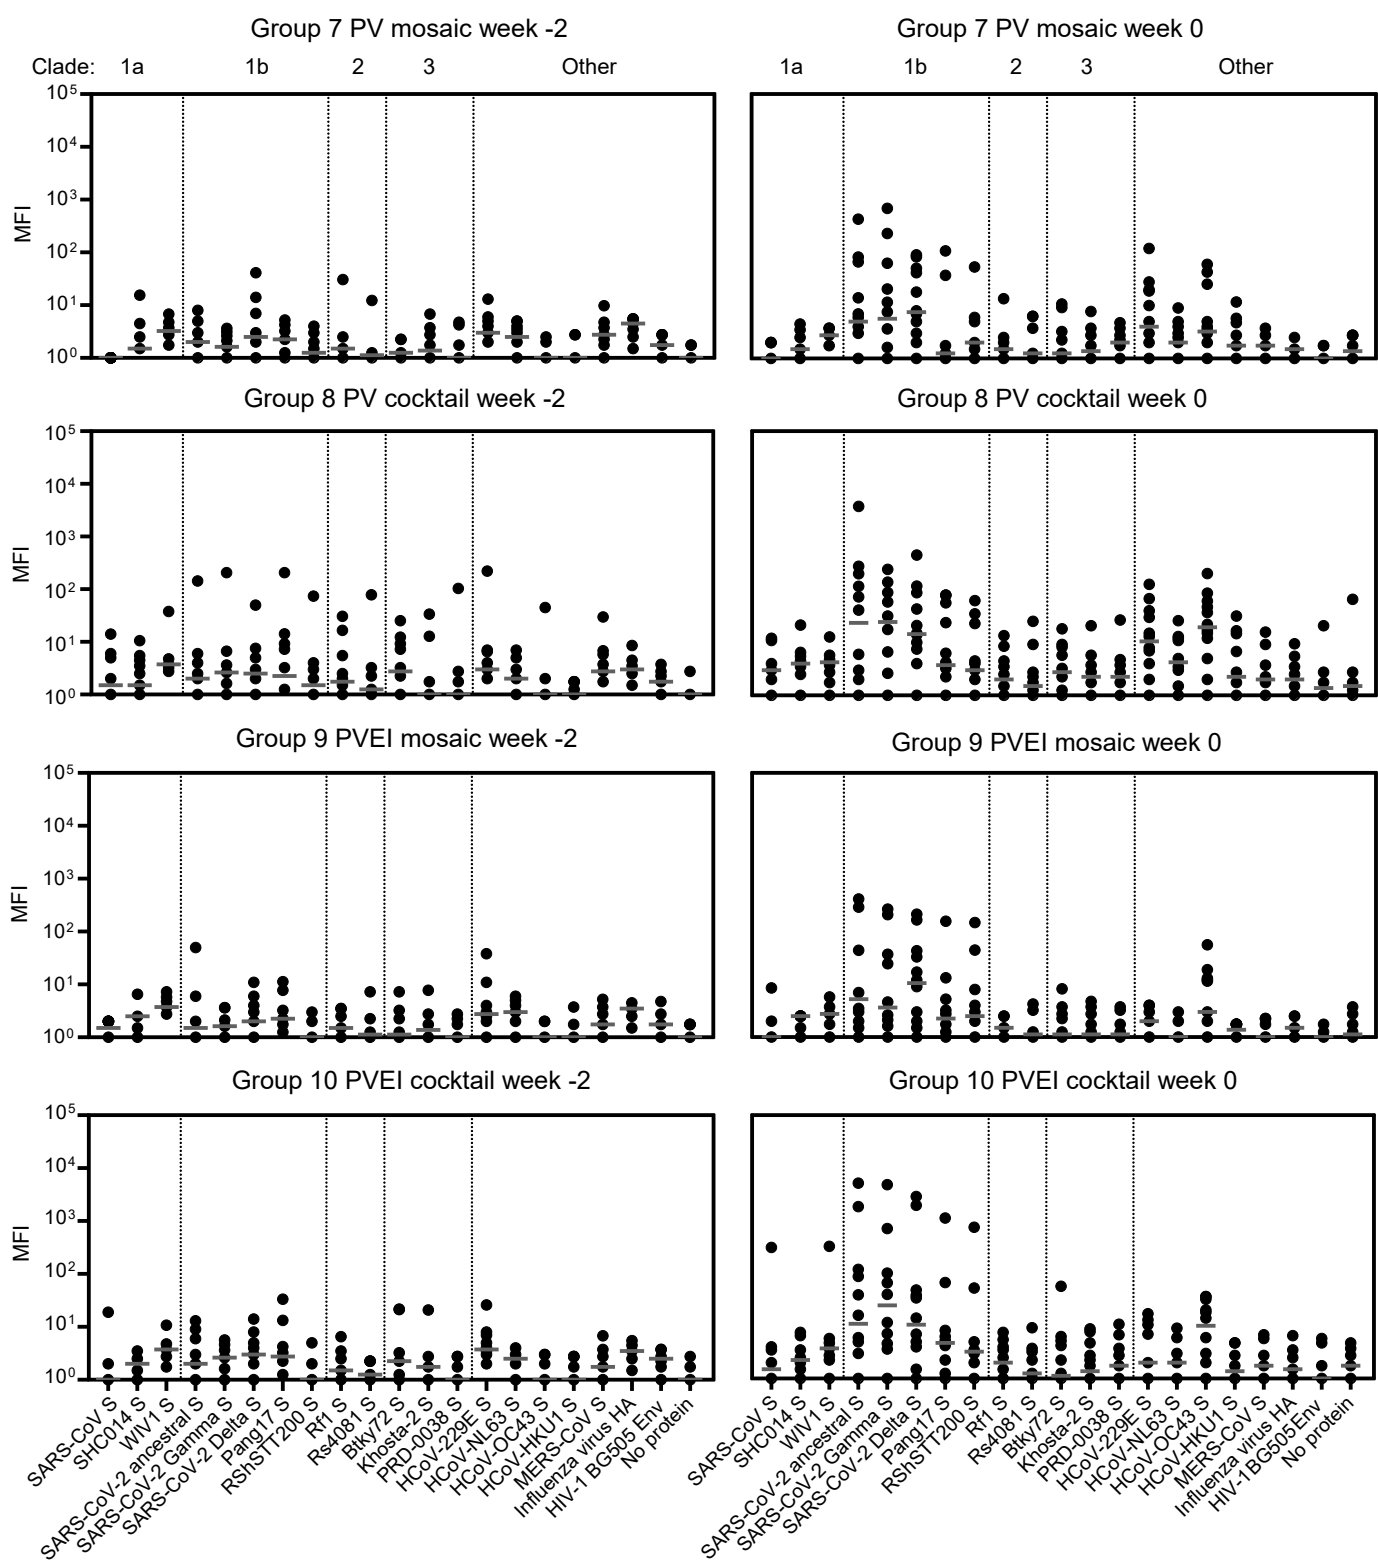

**Figure S4. Ab binding responses in sera at week -2 and 0, related to figure 2** The Ab binding responses in sera from groups 7-10 at weeks -2 and 0, measured in a custom Luminex assay. The serum samples were diluted 1:1,000. The dots represent the MFI values of individual serum samples tested against each protein. The horizontal bars indicate the medians.

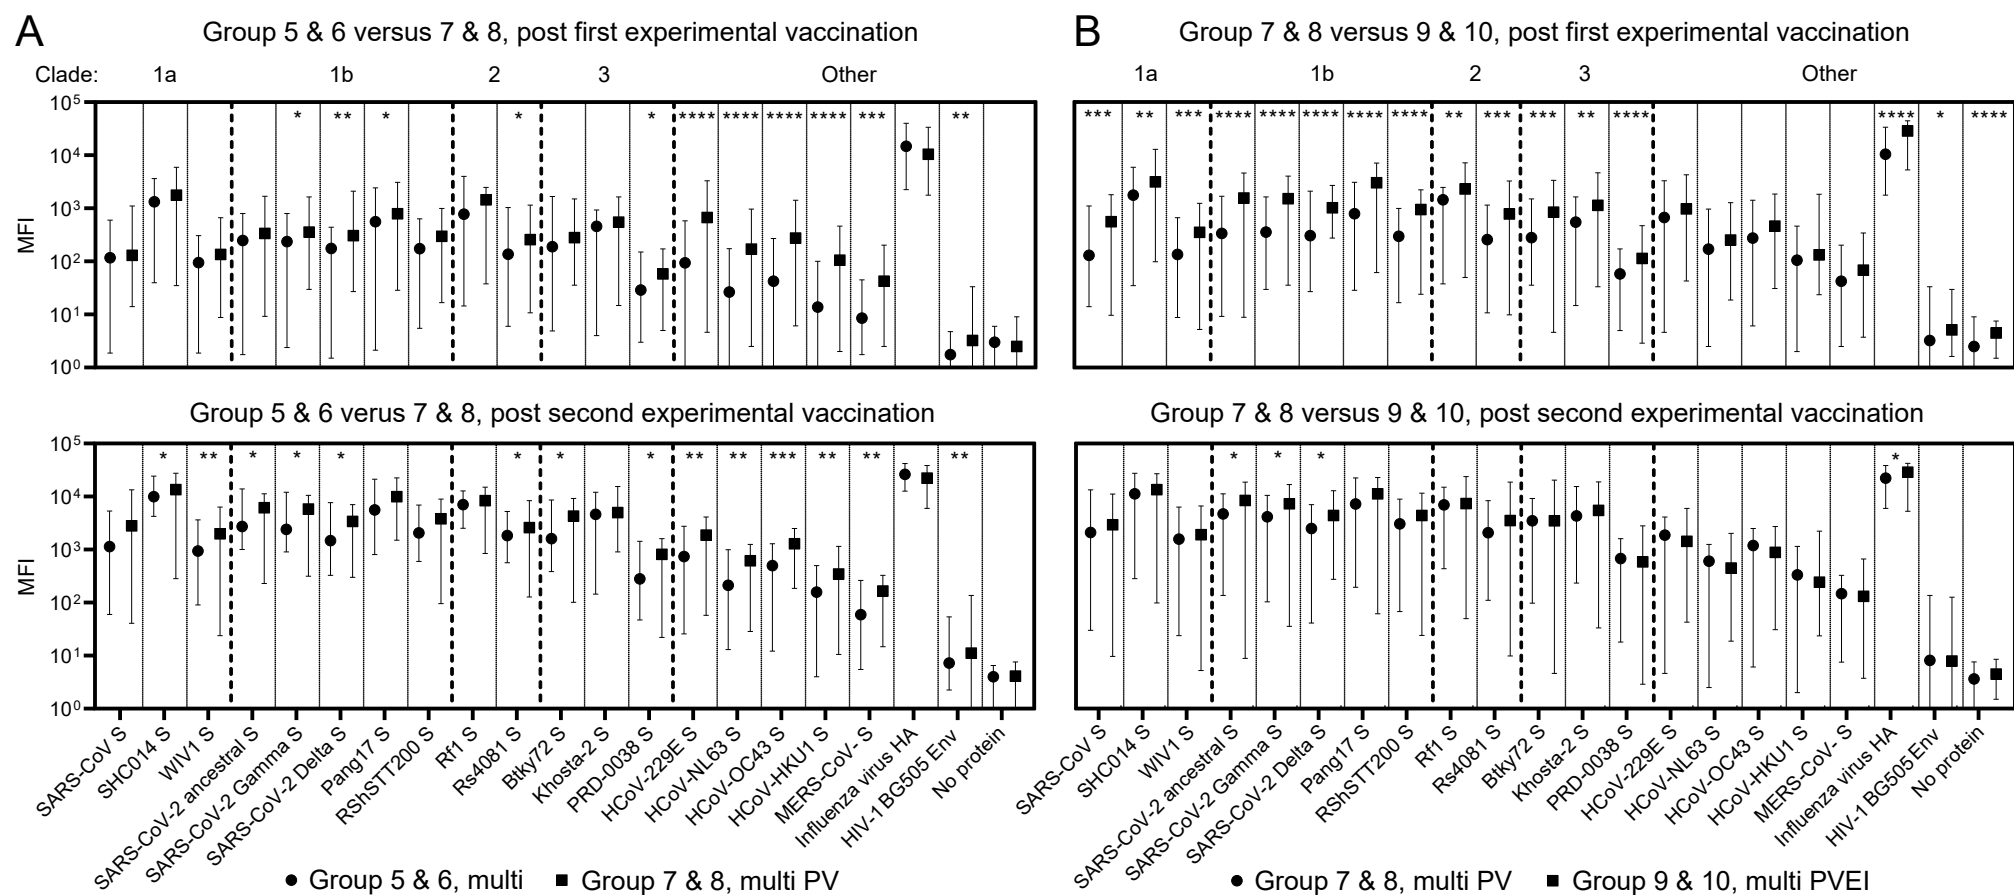

**Figure S5. Ab binding responses in sera, comparing different vaccination protocols, related to figure 2** (A) Comparison of mice that received the multivalent vaccines to mice that received the multivalent vaccines and were pre-vaccinated. The Ab binding responses post the first experimental vaccination (week 6) (upper), and the Ab binding responses post the second experimental vaccination (week 8) (lower) (B) Comparison of mice that received the multivalent vaccines and were pre-vaccinated to mice that received the multivalent vaccines and were pre-vaccinated, with extended vaccination intervals. The Ab binding responses post the first experimental vaccination (week 6) (upper), and the Ab binding responses in mice post the second experimental vaccination (lower). (A,B) The Ab binding responses were measured in a custom Luminex assay. The sera were diluted 1:10,000. The dots represent the median MFI values. The whiskers indicate the range of MFIs measured in all serum samples. The MFI values between groups were compared using the Mann-Whitney U test (\*,  $p < 0.05$ ; \*\*,  $p < 0.01$ ; \*\*\*,  $p < 0.001$ ; \*\*\*\*,  $p < 0.001$ ).

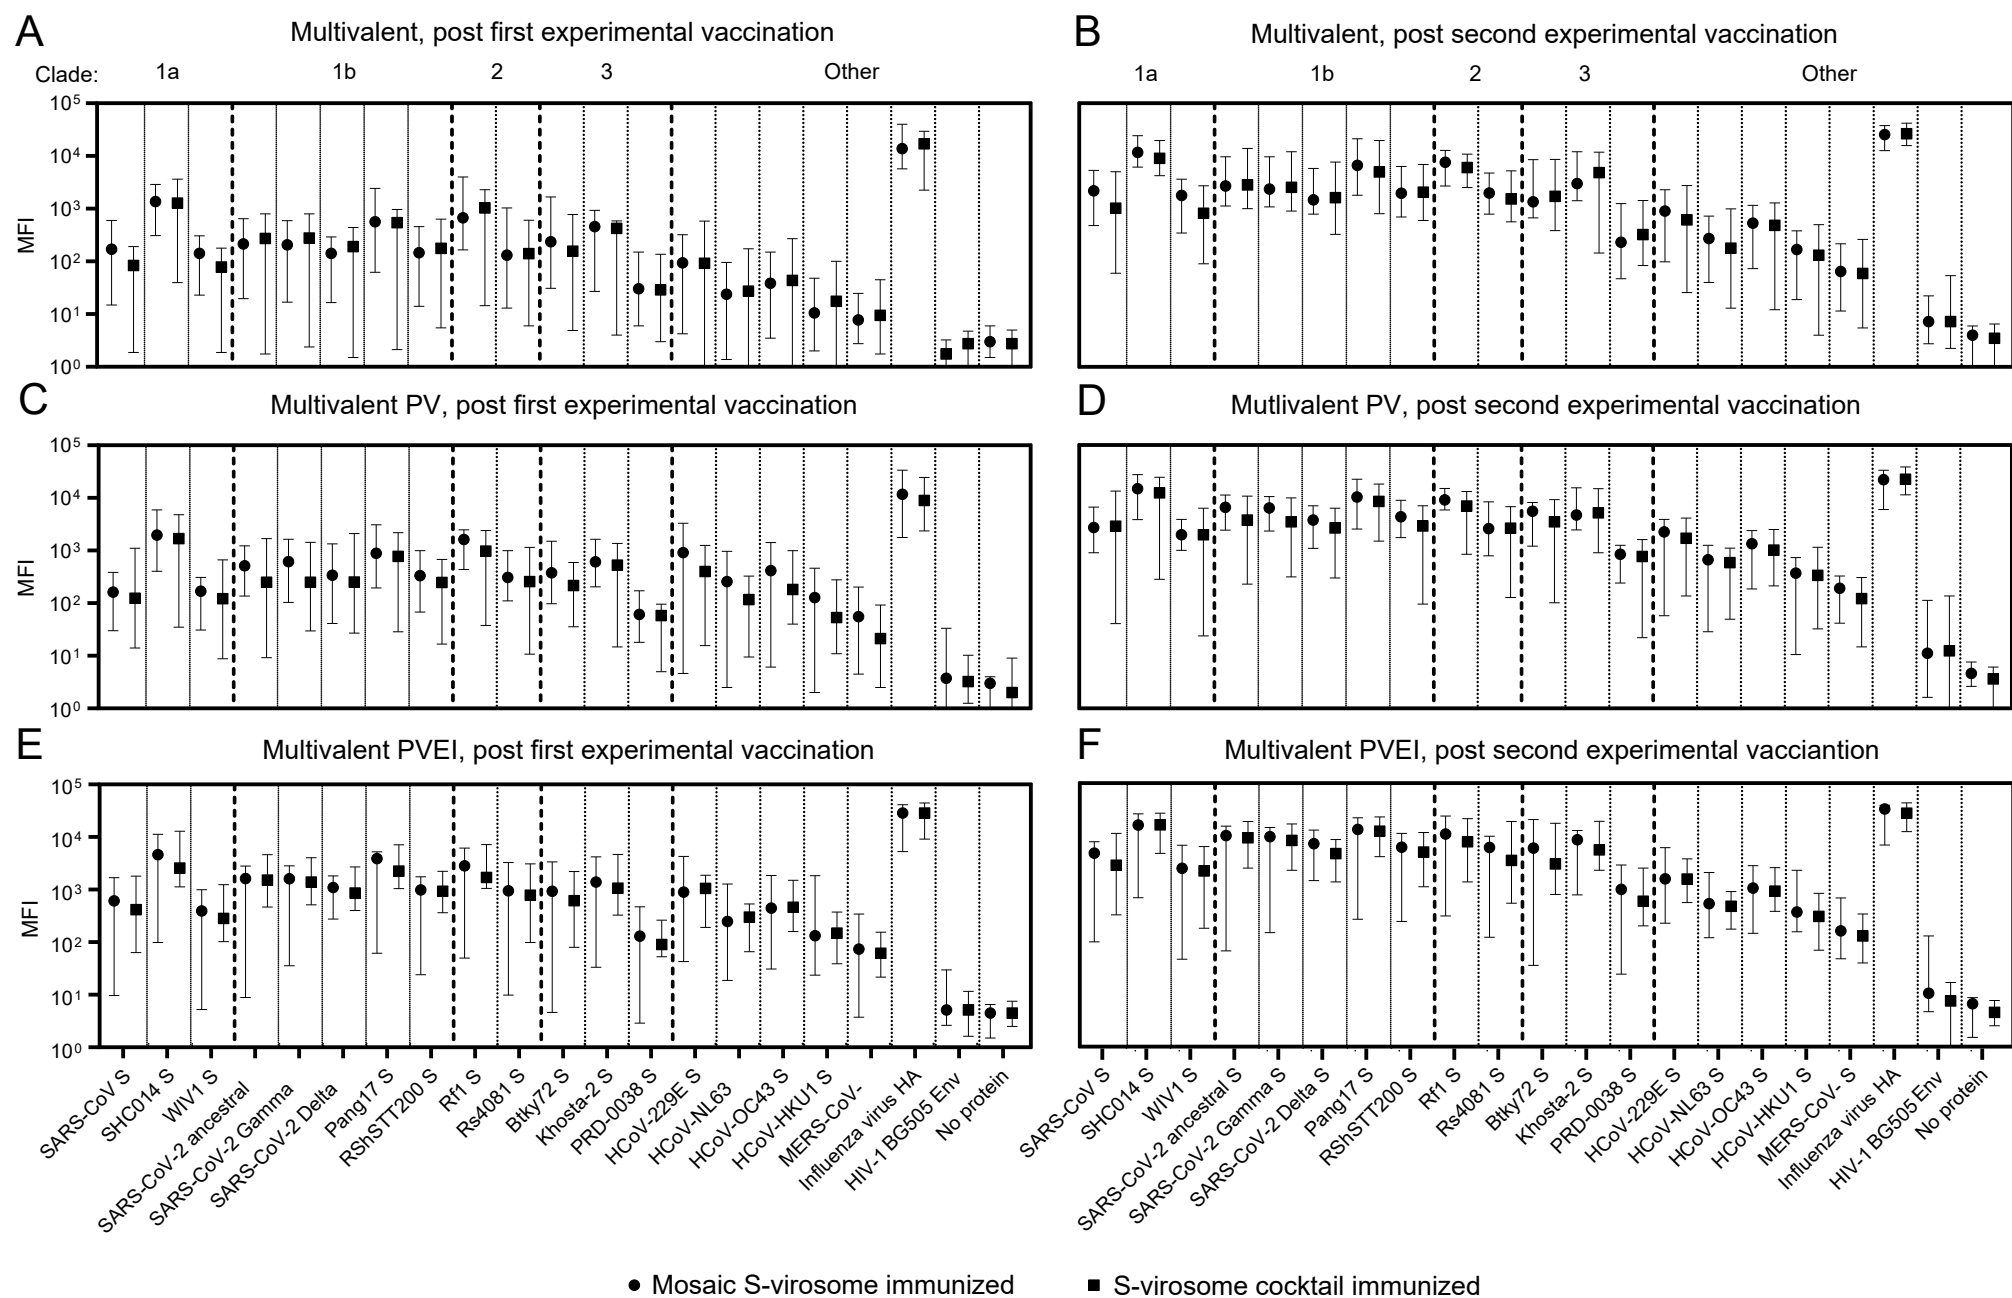

**Figure S6. Ab binding responses in sera, comparing mosaic S-virosome and S-virosome cocktail vaccinations, related to figure 2 (A)** Comparison of Ab binding responses in mosaic S-virosome versus cocktail S-virosome vaccinated mice post the first experimental vaccination (week 6). (B) Comparison of Ab binding responses in mosaic S-virosome versus cocktail S-virosome vaccinated mice post the second experimental vaccination (week 8). (C) Comparison of mosaic S-virosome versus cocktail S-virosome vaccinated mice, mice received the CoV-pre-vaccination post the first experimental vaccination (week 6). (D) Comparison of mosaic S-virosome versus cocktail S-virosome vaccinated mice, mice received the CoV-pre-vaccination post the second experimental vaccination (week 8). (E) Comparison of mosaic S-virosome versus cocktail S-virosome vaccinated mice, mice received the CoV-pre-vaccination, and were vaccinated with extended vaccination intervals post the first experimental vaccination (week 6). (F) Comparison of mosaic S-virosome versus cocktail S-virosome vaccinated mice, mice received the CoV-pre-vaccination, and were vaccinated with extended vaccination intervals post the second experimental vaccination (week 8). (A-E) The Ab binding responses in sera measured in a custom Luminex assay. The sera were diluted 1:10,000. The dots represent the median MFI values. The whiskers indicate the range of MFIs measured in all serum samples. The MFIs between groups were compared using the Mann-Whitney U test.

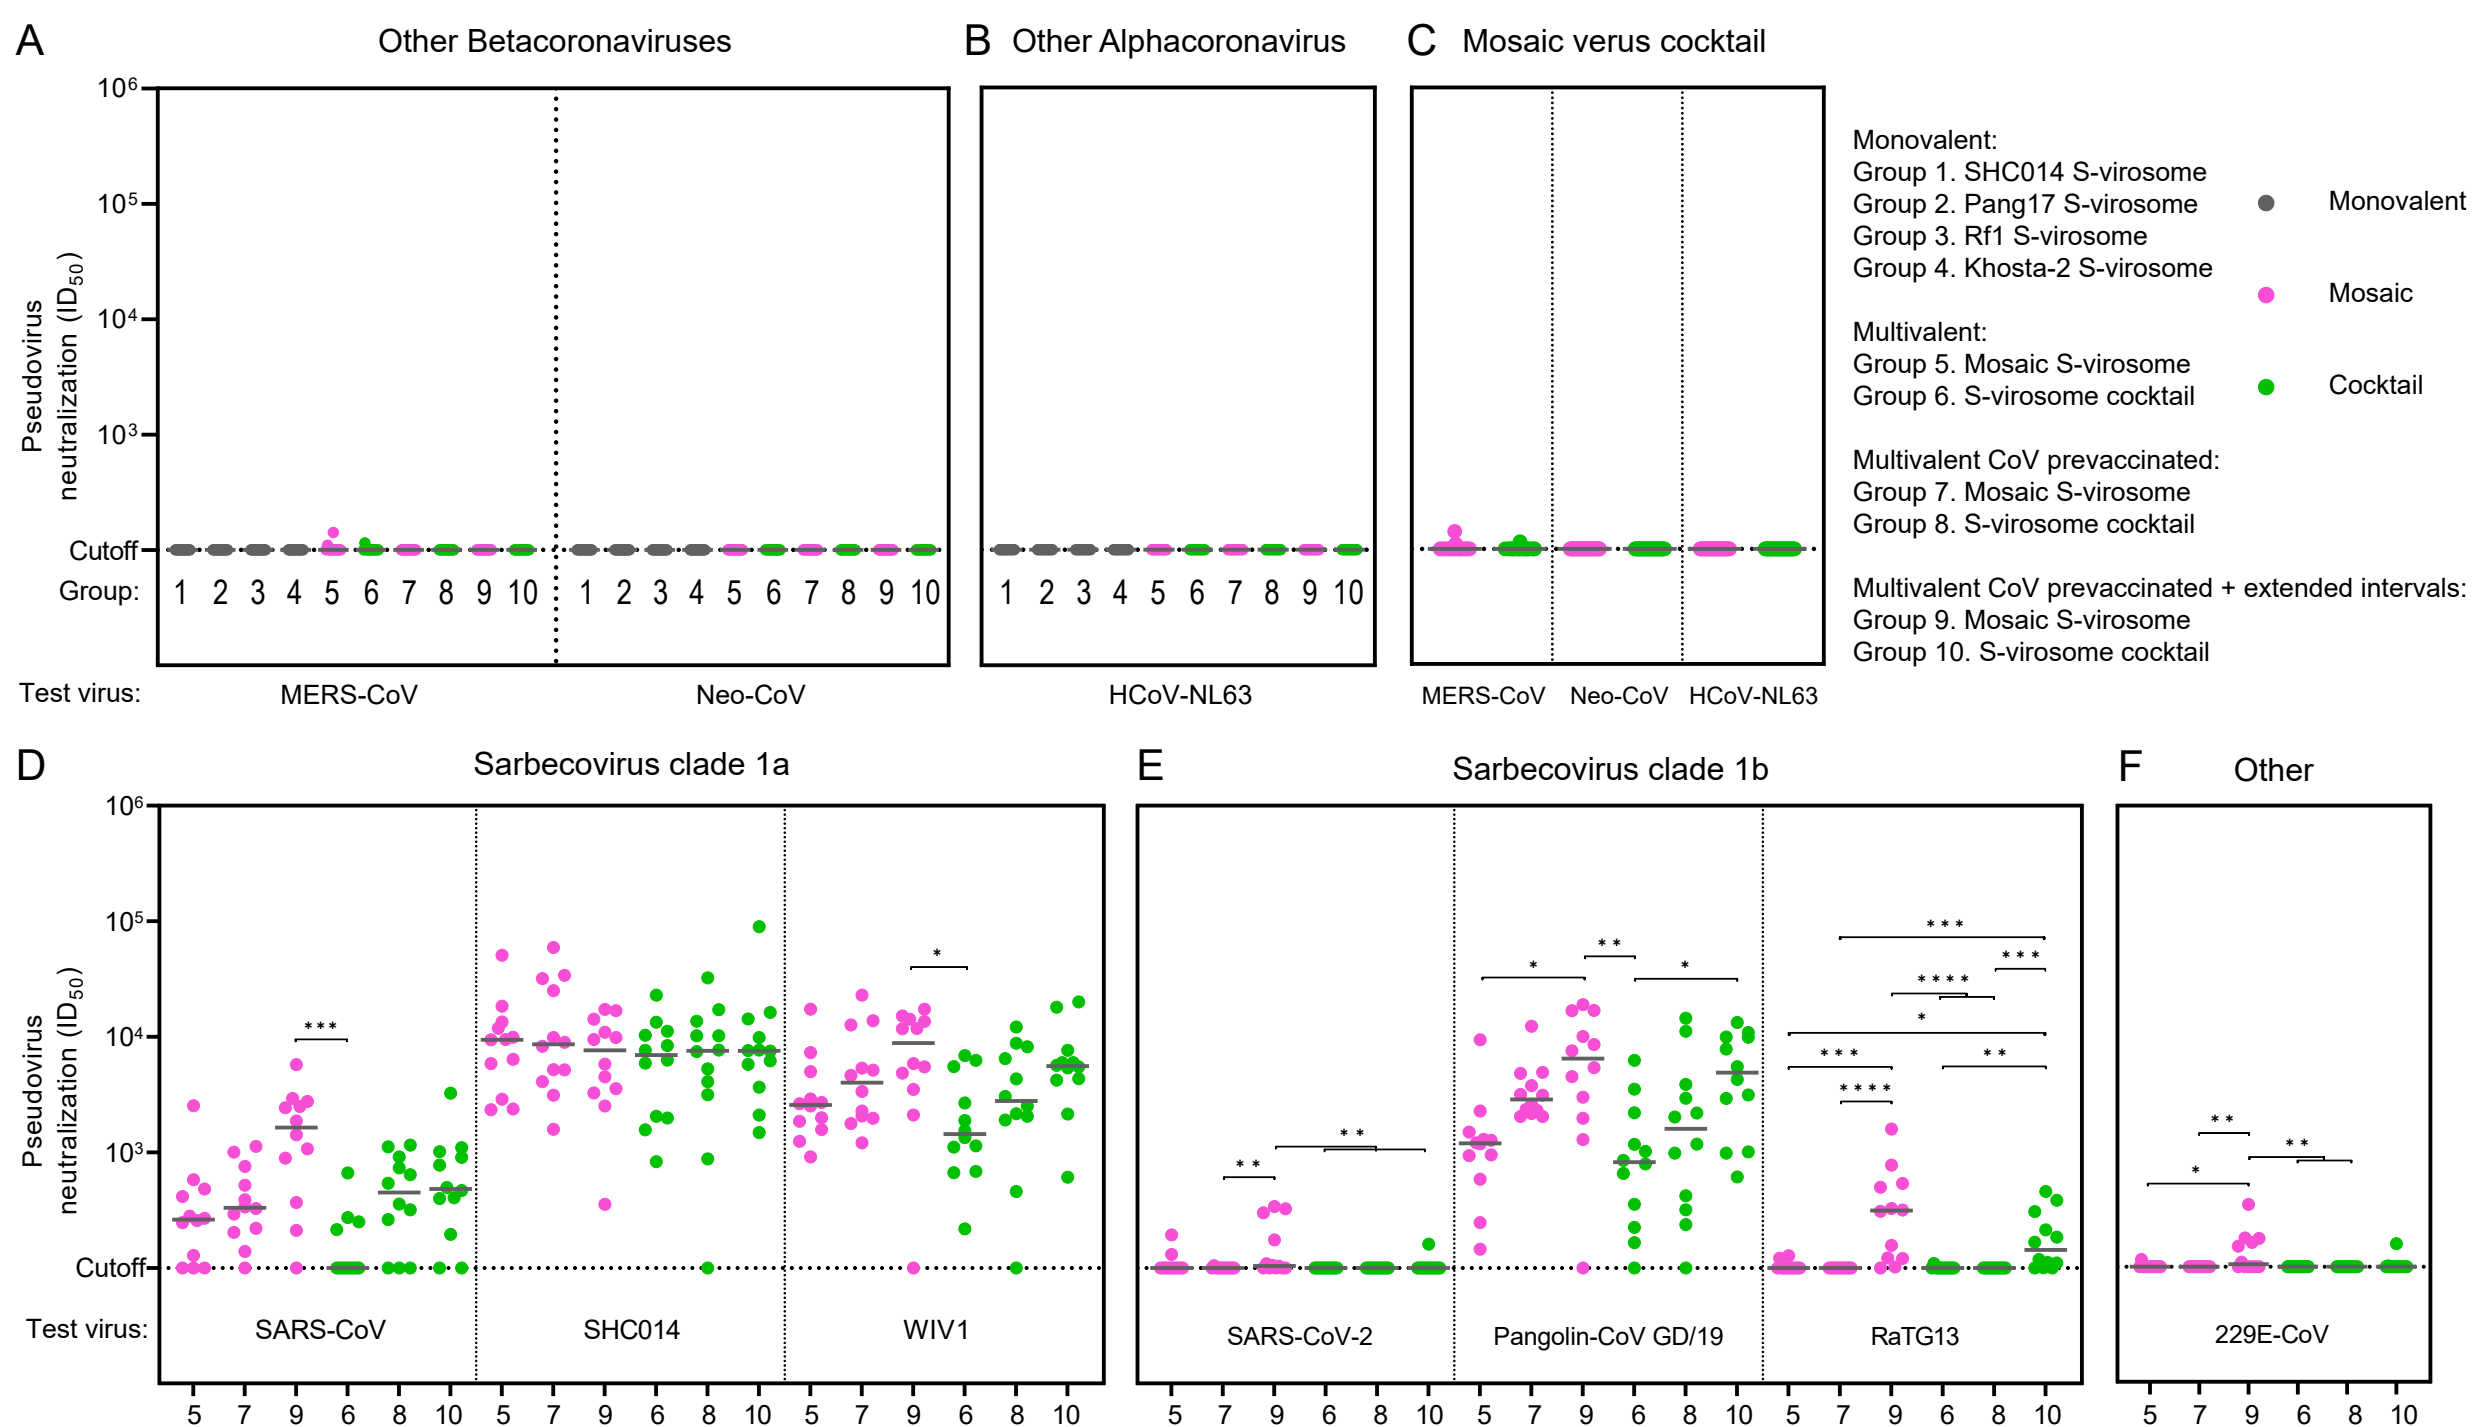

**Figure S7. Pseudovirus neutralization at final bleed, related to figure 3** (A) Pseudovirus neutralization of betacoronaviruses MERS-CoV and Neo-CoV. (B) Pseudovirus neutralization of alphacoronavirus hCoV-NL63. (C) Comparison of pseudovirus neutralization by mosaic S-virosome immunized animals (groups 5, 7 and 9) to S-virosome cocktail immunized animals (groups 6, 8 and 10). (D) Pseudovirus neutralization of clade 1a sarbecoviruses by animals in groups 5-10. (E) Pseudovirus neutralization of clade 1b sarbecoviruses by animals in groups 5-10. (F) Pseudovirus neutralization of hCoV-229E by animals in groups 5-10. (A-F) The dots represent ID<sub>50</sub> titers of individual serum samples against each virus. The horizontal bars indicate the median. The titers between groups were compared using the Kruskal-Wallis test, and Dunn's post-test (\*,  $p < 0.05$ ; \*\*,  $p < 0.01$ ; \*\*\*,  $p < 0.001$ ; \*\*\*\*,  $p < 0.001$ ).



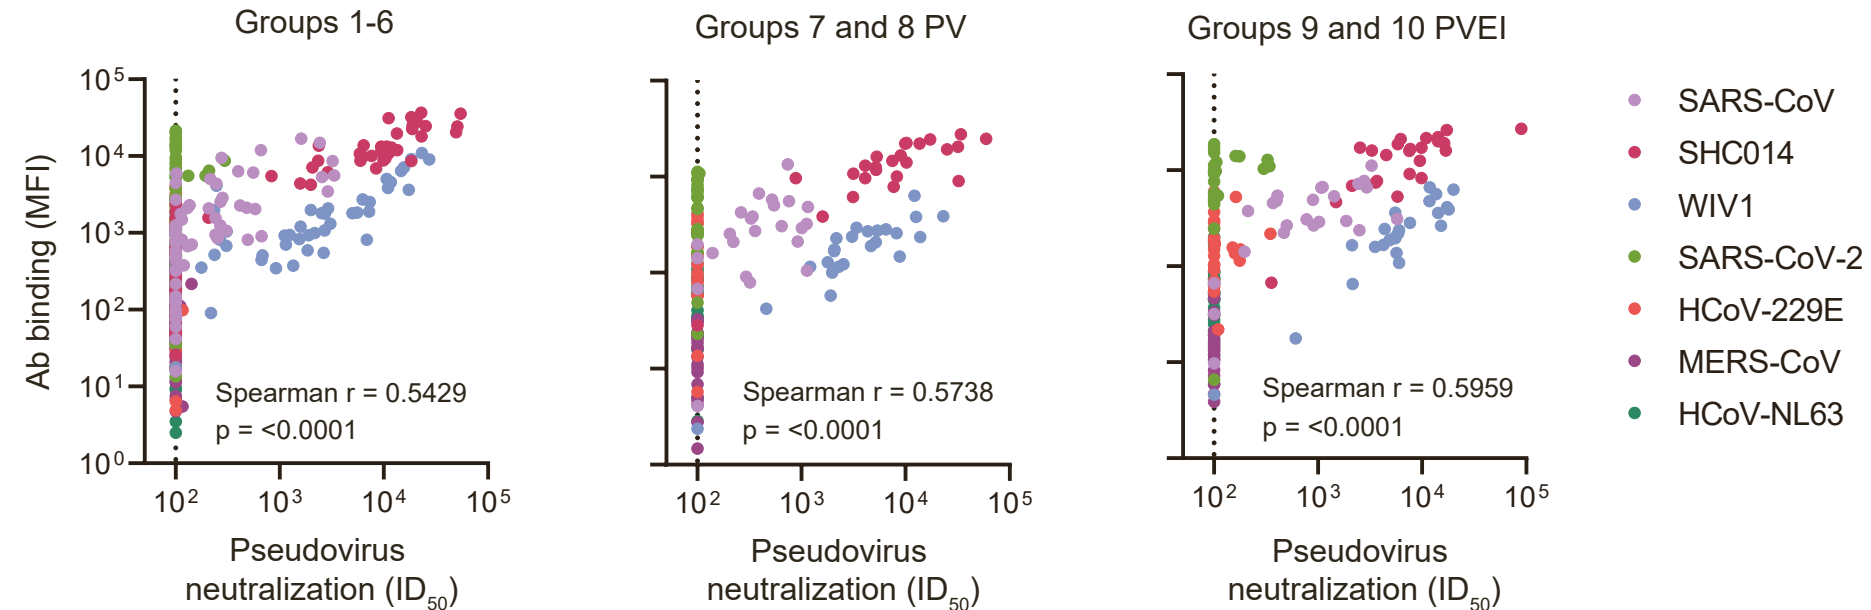

**Figure S8. Correlation between pseudovirus neutralization and antibody binding, related to figures 2 and 3** Correlation between pseudovirus neutralization and antibody binding in groups 1-6 (right), 7 and 8 (middle), and 9 and 10 (left).

Table S1. Pseudovirus neutralization ID50 titers, related to figures 3 and S7

| Pseudovirus sera neutralization ID50s |                       | Pseudovirus Panel |                                        |        |       |                  |                    |              |          |               |                 |               |
|---------------------------------------|-----------------------|-------------------|----------------------------------------|--------|-------|------------------|--------------------|--------------|----------|---------------|-----------------|---------------|
| Virosome vaccine                      | Immunization protocol | Micro ID          | SARS-CoV                               | SHC014 | WV1   | SARS-CoV-2 D614G | Pangolin-CoV GD/19 | RaTG13 T403R | MERS-CoV | Neo CoV T510F | HCoV-NL63 I507L | HCoV-229E-CoV |
| SHC014 S                              | Standard              | gr1-1             | 281                                    | 10620  | 3953  | <100             | 1111               | <100         | <100     | <100          | <100            | <100          |
|                                       |                       | gr1-2             | 491                                    | 28215  | 2156  | <100             | <100               | <100         | <100     | <100          | <100            | <100          |
|                                       |                       | gr1-3             | 655                                    | 18840  | 14588 | <100             | <100               | <100         | <100     | <100          | <100            | <100          |
|                                       |                       | gr1-4             | 101                                    | 18742  | 245   | <100             | <100               | <100         | <100     | <100          | <100            | <100          |
|                                       |                       | gr1-5             | 398                                    | 54455  | 10588 | <100             | 338                | <100         | <100     | <100          | <100            | <100          |
|                                       |                       | gr1-6             | 2425                                   | 105332 | 18373 | <100             | 3258               | <100         | <100     | <100          | <100            | <100          |
|                                       |                       | gr1-7             | 176                                    | 22998  | 27169 | <100             | 2605               | 969          | <100     | <100          | <100            | <100          |
|                                       |                       | gr1-8             | 1605                                   | 18076  | 23238 | <100             | 1960               | <100         | <100     | <100          | <100            | <100          |
|                                       |                       | gr1-9             | 3218                                   | 11077  | 15611 | 261              | 3755               | 338          | <100     | <100          | <100            | <100          |
|                                       |                       | gr1-10            | 3335                                   | 20861  | 11642 | <100             | 1745               | <100         | <100     | <100          | <100            | <100          |
|                                       |                       | gr1-11            | 2879                                   | 45278  | 7215  | 209              | 789                | 218          | <100     | <100          | <100            | <100          |
|                                       |                       | gr1-12            | 554                                    | 18283  | 10912 | <100             | 1114               | <100         | <100     | <100          | <100            | <100          |
| Pang17 S                              | Standard              | gr2-13            | 268                                    | <100   | 268   | <100             | 9318               | 929          | <100     | <100          | <100            | <100          |
|                                       |                       | gr2-14            | <100                                   | <100   | <100  | <100             | 12896              | <100         | <100     | <100          | <100            | <100          |
|                                       |                       | gr2-15            | <100                                   | <100   | <100  | <100             | 2887               | <100         | <100     | <100          | <100            | <100          |
|                                       |                       | gr2-16            | 136                                    | <100   | <100  | <100             | 8284               | 492          | <100     | <100          | <100            | <100          |
|                                       |                       | gr2-17            | 119                                    | <100   | <100  | <100             | 3231               | <100         | <100     | <100          | <100            | <100          |
|                                       |                       | gr2-18            | 267                                    | <100   | <100  | <100             | 15153              | <100         | <100     | <100          | <100            | <100          |
|                                       |                       | gr2-19            | 114                                    | <100   | 306   | <100             | 2233               | <100         | <100     | <100          | <100            | <100          |
|                                       |                       | gr2-20            | 115                                    | 306    | 306   | <100             | 6631               | <100         | <100     | <100          | <100            | <100          |
|                                       |                       | gr2-21            | 306                                    | <100   | <100  | <100             | 3322               | <100         | <100     | <100          | <100            | <100          |
|                                       |                       | gr2-22            | 111                                    | <100   | 233   | <100             | 5979               | <100         | <100     | <100          | <100            | <100          |
|                                       |                       | gr2-23            | <100                                   | <100   | <100  | <100             | 1391               | <100         | <100     | <100          | <100            | <100          |
|                                       |                       | gr2-24            | 207                                    | <100   | <100  | <100             | 2719               | <100         | <100     | <100          | <100            | <100          |
| Rf-1 S                                | Standard              | gr3-25            | <100                                   | <100   | <100  | <100             | <100               | <100         | <100     | <100          | <100            | <100          |
|                                       |                       | gr3-26            | <100                                   | <100   | <100  | <100             | 589                | <100         | <100     | <100          | <100            | <100          |
|                                       |                       | gr3-27            | <100                                   | <100   | <100  | <100             | <100               | <100         | <100     | <100          | <100            | <100          |
|                                       |                       | gr3-28            | <100                                   | <100   | <100  | <100             | <100               | <100         | <100     | <100          | <100            | <100          |
|                                       |                       | gr3-29            | <100                                   | <100   | <100  | <100             | <100               | <100         | <100     | <100          | <100            | <100          |
|                                       |                       | gr3-30            | <100                                   | <100   | <100  | <100             | <100               | <100         | <100     | <100          | <100            | <100          |
|                                       |                       | gr3-31            | <100                                   | <100   | <100  | <100             | <100               | <100         | <100     | <100          | <100            | <100          |
|                                       |                       | gr3-32            | <100                                   | <100   | <100  | <100             | <100               | <100         | <100     | <100          | <100            | <100          |
|                                       |                       | gr3-33            | <100                                   | <100   | <100  | <100             | <100               | <100         | <100     | <100          | <100            | <100          |
|                                       |                       | gr3-34            | <100                                   | <100   | <100  | <100             | 436                | 186          | <100     | <100          | <100            | <100          |
|                                       |                       | gr3-35            | <100                                   | <100   | <100  | <100             | <100               | <100         | <100     | <100          | <100            | <100          |
|                                       |                       | gr3-36            | <100                                   | <100   | <100  | <100             | <100               | <100         | <100     | <100          | <100            | <100          |
| Khosta-2 S                            | Standard              | gr4-37            | <100                                   | <100   | <100  | <100             | <100               | <100         | <100     | <100          | <100            | <100          |
|                                       |                       | gr4-38            | <100                                   | <100   | <100  | <100             | <100               | <100         | <100     | <100          | <100            | <100          |
|                                       |                       | gr4-39            | <100                                   | <100   | <100  | <100             | <100               | <100         | <100     | <100          | <100            | <100          |
|                                       |                       | gr4-40            | <100                                   | <100   | <100  | <100             | <100               | <100         | <100     | <100          | <100            | <100          |
|                                       |                       | gr4-41            | <100                                   | <100   | <100  | <100             | <100               | <100         | <100     | <100          | <100            | <100          |
|                                       |                       | gr4-42            | <100                                   | <100   | <100  | <100             | <100               | <100         | <100     | <100          | <100            | <100          |
|                                       |                       | gr4-43            | <100                                   | <100   | <100  | <100             | <100               | <100         | <100     | <100          | <100            | <100          |
|                                       |                       | gr4-44            | <100                                   | <100   | <100  | <100             | <100               | <100         | <100     | <100          | <100            | <100          |
|                                       |                       | gr4-45            | <100                                   | <100   | <100  | <100             | <100               | <100         | <100     | <100          | <100            | <100          |
|                                       |                       | gr4-46            | <100                                   | <100   | <100  | <100             | <100               | <100         | <100     | <100          | <100            | <100          |
|                                       |                       | gr4-47            | <100                                   | <100   | <100  | <100             | <100               | <100         | <100     | <100          | <100            | <100          |
|                                       |                       | gr4-48            | <100                                   | <100   | <100  | <100             | <100               | <100         | <100     | <100          | <100            | <100          |
| Mosaic                                | Standard              | gr5-49            | 578                                    | 5852   | 2703  | <100             | 939                | <100         | <100     | <100          | <100            | <100          |
|                                       |                       | gr5-50            | 2535                                   | 11852  | 17345 | <100             | 9426               | 127          | 110      | <100          | <100            | <100          |
|                                       |                       | gr5-51            | 297                                    | 2339   | 1853  | <100             | 1210               | <100         | <100     | <100          | <100            | <100          |
|                                       |                       | gr5-52            | 414                                    | 2367   | 2323  | 381              | 1497               | <100         | <100     | <100          | <100            | <100          |
|                                       |                       | gr5-53            | <100                                   | 18386  | 915   | <100             | 586                | <100         | <100     | <100          | <100            | <100          |
|                                       |                       | gr5-54            | 246                                    | 50790  | 1988  | 193              | 2277               | <100         | 142      | <100          | <100            | <100          |
|                                       |                       | gr5-55            | 481                                    | 2886   | 1245  | <100             | 1273               | 121          | 1245     | <100          | <100            | <100          |
|                                       |                       | gr5-56            | 268                                    | 13425  | 2897  | <100             | 950                | <100         | <100     | <100          | <100            | <100          |
|                                       |                       | gr5-57            | 128                                    | 9998   | 1578  | <100             | 247                | <100         | <100     | <100          | <100            | <100          |
|                                       |                       | gr5-58            | 286                                    | 9414   | 4995  | <100             | 146                | <100         | <100     | <100          | <100            | <100          |
|                                       |                       | gr5-59            | <100                                   | 6378   | 2629  | <100             | 1298               | <100         | <100     | <100          | <100            | <100          |
|                                       |                       | gr5-60            | <100                                   | 9449   | 2522  | <100             | 1184               | <100         | <100     | <100          | <100            | 116           |
| Cocktail                              | Standard              | gr6-61            | <100                                   | 11173  | 1882  | <100             | 2197               | 110          | <100     | <100          | <100            | <100          |
|                                       |                       | gr6-62            | 214                                    | 13373  | 6258  | <100             | 6252               | <100         | <100     | <100          | <100            | <100          |
|                                       |                       | gr6-63            | <100                                   | 6287   | 1111  | <100             | 1018               | <100         | <100     | <100          | <100            | <100          |
|                                       |                       | gr6-64            | <100                                   | 1982   | 1137  | <100             | 258                | <100         | <100     | <100          | <100            | <100          |
|                                       |                       | gr6-65            | <100                                   | 1954   | 638   | <100             | 322                | <100         | <100     | <100          | <100            | <100          |
|                                       |                       | gr6-66            | <100                                   | 22820  | 683   | <100             | 355                | <100         | <100     | <100          | <100            | <100          |
|                                       |                       | gr6-67            | 665                                    | 10329  | 1342  | <100             | 165                | <100         | <100     | <100          | <100            | <100          |
|                                       |                       | gr6-68            | <100                                   | 7632   | 6869  | <100             | 1175               | <100         | <100     | <100          | <100            | <100          |
|                                       |                       | gr6-69            | 251                                    | 8413   | 666   | <100             | 657                | <100         | <100     | <100          | <100            | <100          |
|                                       |                       | gr6-70            | <100                                   | 2057   | 5521  | <100             | 3514               | <100         | <100     | <100          | <100            | <100          |
|                                       |                       | gr6-71            | <100                                   | 629    | 678   | <100             | 852                | <100         | <100     | <100          | <100            | <100          |
|                                       |                       | gr6-72            | 272                                    | 5935   | 1540  | <100             | 794                | <100         | <100     | <100          | <100            | <100          |
| Mosaic                                | Pre-vaccination       | gr7-73            | 337                                    | 8996   | 13788 | <100             | 3178               | <100         | <100     | <100          | <100            | <100          |
|                                       |                       | gr7-74            | 293                                    | 1586   | 1209  | <100             | 3783               | <100         | <100     | <100          | <100            | <100          |
|                                       |                       | gr7-75            | 519                                    | 9889   | 12630 | <100             | 2305               | <100         | <100     | <100          | <100            | <100          |
|                                       |                       | gr7-76            | 389                                    | 5174   | 3372  | <100             | 4827               | <100         | <100     | <100          | <100            | <100          |
|                                       |                       | gr7-77            | <100                                   | 9498   | 2486  | <100             | 2045               | <100         | <100     | <100          | <100            | <100          |
|                                       |                       | gr7-78            | 38                                     | 3256   | 2275  | <100             | 2173               | <100         | <100     | <100          | <100            | <100          |
|                                       |                       | gr7-79            | 757                                    | 25057  | 22954 | 194              | 12345              | <100         | <100     | <100          | <100            | <100          |
|                                       |                       | gr7-80            | 1003                                   | 58364  | 5361  | <100             | 2605               | <100         | <100     | <100          | <100            | <100          |
|                                       |                       | gr7-81            | 326                                    | 31817  | 4634  | <100             | 3124               | <100         | <100     | <100          | <100            | <100          |
|                                       |                       | gr7-82            | 220                                    | 3126   | 1779  | <100             | 2346               | <100         | <100     | <100          | <100            | <100          |
|                                       |                       | gr7-83            | 295                                    | 5193   | 5149  | <100             | 4823               | <100         | <100     | <100          | <100            | <100          |
|                                       |                       | gr7-84            | 1129                                   | 4093   | 1972  | <100             | 2047               | <100         | <100     | <100          | <100            | <100          |
| Cocktail                              | Pre-vaccination       | gr8-85            | 1153                                   | 32400  | 3050  | <100             | 2946               | <100         | <100     | <100          | <100            | <100          |
|                                       |                       | gr8-86            | 642                                    | 3148   | 2163  | <100             | 2189               | <100         | <100     | <100          | <100            | <100          |
|                                       |                       | gr8-87            | <100                                   | 5275   | 2518  | <100             | 318                | <100         | <100     | <100          | <100            | <100          |
|                                       |                       | gr8-88            | 916                                    | 4096   | 8767  | <100             | 14467              | <100         | <100     | <100          | <100            | <100          |
|                                       |                       | gr8-89            | <100                                   | 876    | 458   | <100             | 237                | <100         | <100     | <100          | <100            | <100          |
|                                       |                       | gr8-90            | 1118                                   | 13626  | 6467  | <100             | 3878               | <100         | <100     | <100          | <100            | <100          |
|                                       |                       | gr8-91            | 359                                    | 7692   | 2057  | <100             | 1177               | <100         | <100     | <100          | <100            | <100          |
|                                       |                       | gr8-92            | <100                                   | <100   | <100  | <100             | <100               | <100         | <100     | <100          | <100            | <100          |
|                                       |                       | gr8-93            | 318                                    | 10206  | 1901  | <100             | 986                | <100         | <100     | <100          | <100            | <100          |
|                                       |                       | gr8-94            | 262                                    | 10215  | 8174  | <100             | 2018               | <100         | <100     | <100          | <100            | <100          |
|                                       |                       | gr8-95            | 541                                    | 7452   | 4330  | <100             | 421                | <100         | <100     | <100          | <100            | <100          |
|                                       |                       | Mosaic            | Pre-vaccination with extended protocol | gr9-96 | 734   | 17145            | 12177              | <100         | 11161    | <100          | <100            | <100          |
| gr9-97                                | 5735                  |                   |                                        | 9538   | 15117 | 325              | 16932              | 1597         | <100     | <100          | <100            | <100          |
| gr9-98                                | 893                   |                   |                                        | 14221  | 5873  | <100             | 1971               | 102          | <100     | <100          | <100            | 175           |
| gr9-99                                | 2930                  |                   |                                        | 16848  | 17346 | 105              | 16792              | 538          | <100     | <100          | <100            | 150           |
| gr9-100                               | 368                   |                   |                                        | 9481   | 2107  | 103              | 7567               | 773          | <100     | <100          | <100            | 347           |
| gr9-101                               | 2493                  |                   |                                        | 3558   | 5499  | 109              | 4516               | 327          | <100     | <100          | <100            | 175           |
| gr9-102                               | <100                  |                   |                                        | 356    | <100  | <100             | <100               | <100         | <100     | <100          | <100            | 116           |
| gr9-103                               | 1892                  |                   |                                        | 3059   | 4538  | <100             | 1290               | 325          | <100     | <100          | <100            | <100          |
| gr9-104                               | 2429                  |                   |                                        | 2525   | 11769 | <100             | 8682               | 310          | <100     | <100          | <100            | <100          |
| gr9-105                               | 1072                  |                   |                                        | 17207  | 11824 | 299              | 5399               | 316          | <100     | <100          | <100            | 162           |
| gr9-106                               | 2760                  |                   |                                        | 5805   | 13599 | 339              | 10037              | 500          | <100     | <100          | <100            | <100          |
| gr9-107                               | 1417                  |                   |                                        | 10937  | 14162 | 175              | 1899               |              |          |               |                 |               |
